# Supplementary material for: An upconversion nanoparticle-based fluorescence resonance energy transfer system for effectively sensing caspase-3 activity
Source: Royal Society of Chemistry journal article supplement (doi:10.1039/c7an01744h), 2017-12-22
Supplement: c7an01744h1.pdf [file c7an01744h1.pdf]

Electronic Supplementary Information(ESI) for:  
**Upconversion Nanoparticle-Based Fluorescence Resonance  
Energy Transfer System for Effective Sensing Caspase-3 Activity**

Lin Liu,<sup>a</sup> Hua Zhang,<sup>b,\*</sup> Daqian Song,<sup>a,\*</sup> Zhenxin Wang<sup>b</sup>

<sup>a</sup>College of Chemistry, Jilin University, Changchun 130012, P. R. China

<sup>b</sup>State Key Laboratory of Electroanalytical Chemistry, Changchun Institute of Applied Chemistry, Chinese Academy of Sciences, Changchun 130022, P. R. China.

**Contents**

Additional figures S1-S8

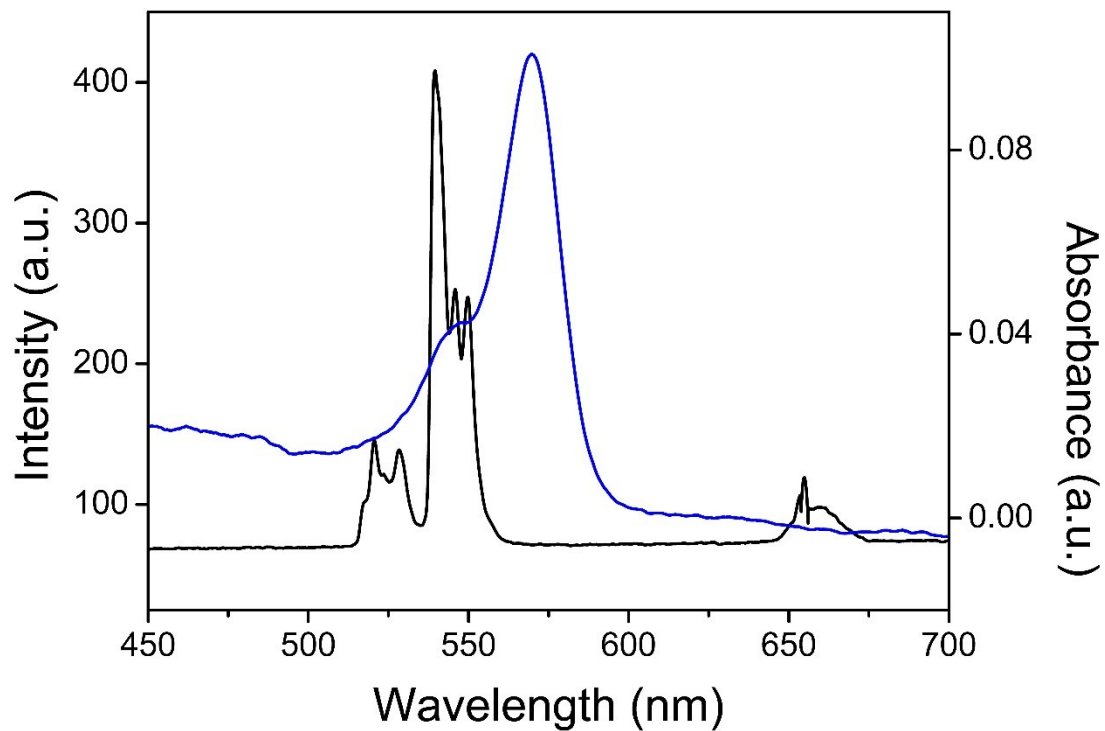

**Fig. S1** The UCL spectrum of NaGdF<sub>4</sub>: Yb<sup>3+</sup>, Er<sup>3+</sup>@NaGdF<sub>4</sub> UCNPs (0.3 mg mL<sup>-1</sup> in cyclohexane, black line) and absorption spectrum of RB-pCasCPP (0.5 mg mL<sup>-1</sup> in PBS, blue line).

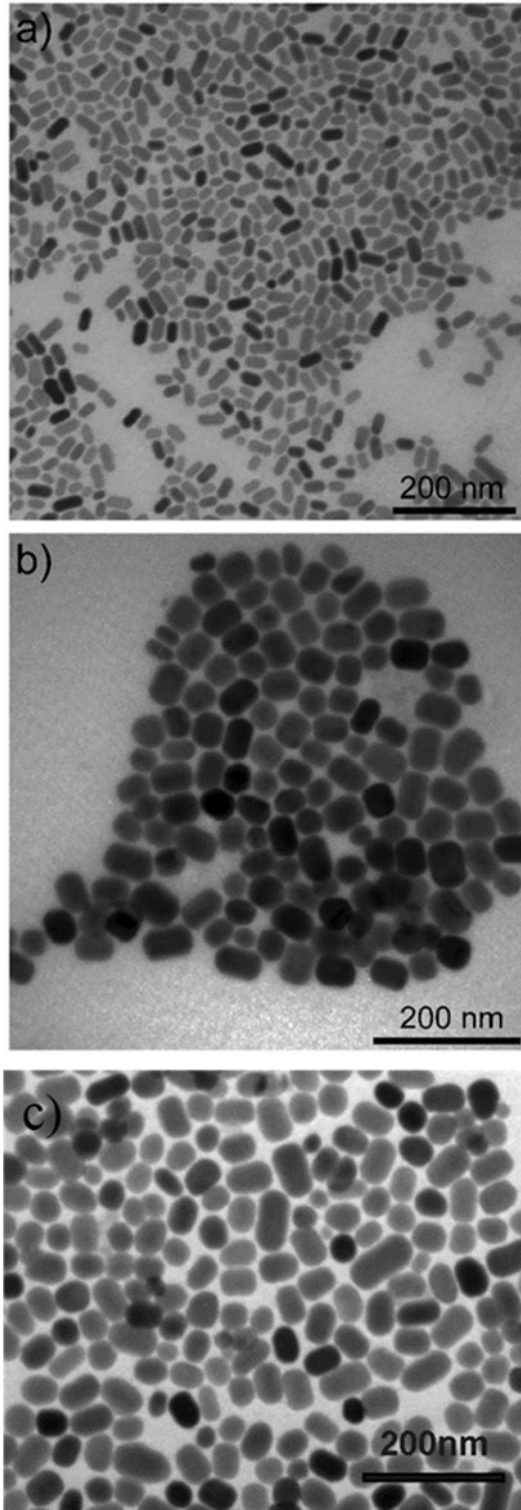

**Fig. S2** TEM micrograph of NaGdF<sub>4</sub>: Yb<sup>3+</sup>, Er<sup>3+</sup>UCNPs (a), NaGdF<sub>4</sub>: Yb<sup>3+</sup>, Er<sup>3+</sup>@NaGdF<sub>4</sub> UCNPs (b) and NaGdF<sub>4</sub>: Yb<sup>3+</sup>, Er<sup>3+</sup>@NaGdF<sub>4</sub> UCNP@RB-pCasCPP (c).

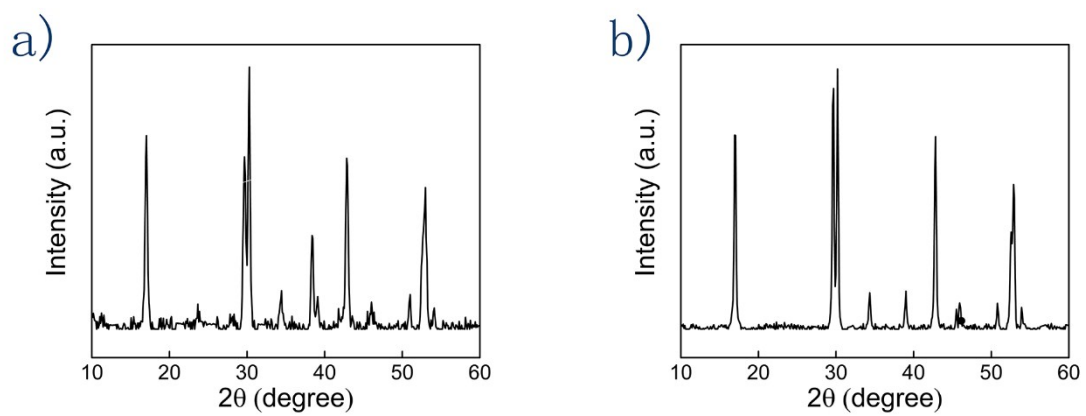

**Fig. S3** X-ray diffraction patterns of NaGdF<sub>4</sub>: Yb<sup>3+</sup>, Er<sup>3+</sup> UCNPs (a) and NaGdF<sub>4</sub>: Yb<sup>3+</sup>, Er<sup>3+</sup>@NaGdF<sub>4</sub> UCNPs (b).

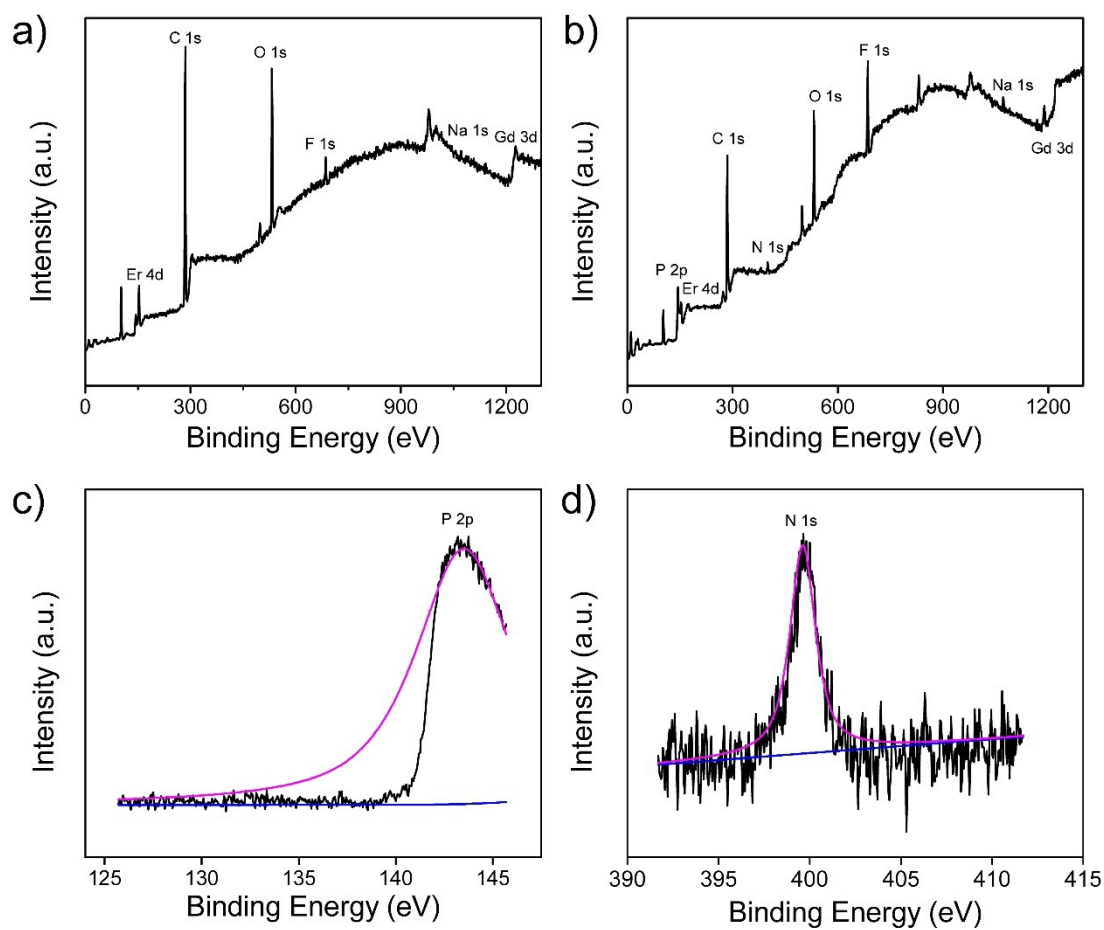

**Fig. S4** XPS survey spectra of oleate capped NaGdF<sub>4</sub>: Yb<sup>3+</sup>, Er<sup>3+</sup>@NaGdF<sub>4</sub> UCNPs (a) and NaGdF<sub>4</sub>: Yb<sup>3+</sup>, Er<sup>3+</sup>@NaGdF<sub>4</sub> UCNP@RB-pCasCPP (b), and P 2p(c) and N 1s (d) XPS spectra of NaGdF<sub>4</sub>: Yb<sup>3+</sup>, Er<sup>3+</sup>@NaGdF<sub>4</sub> UCNP@RB-pCasCPP.

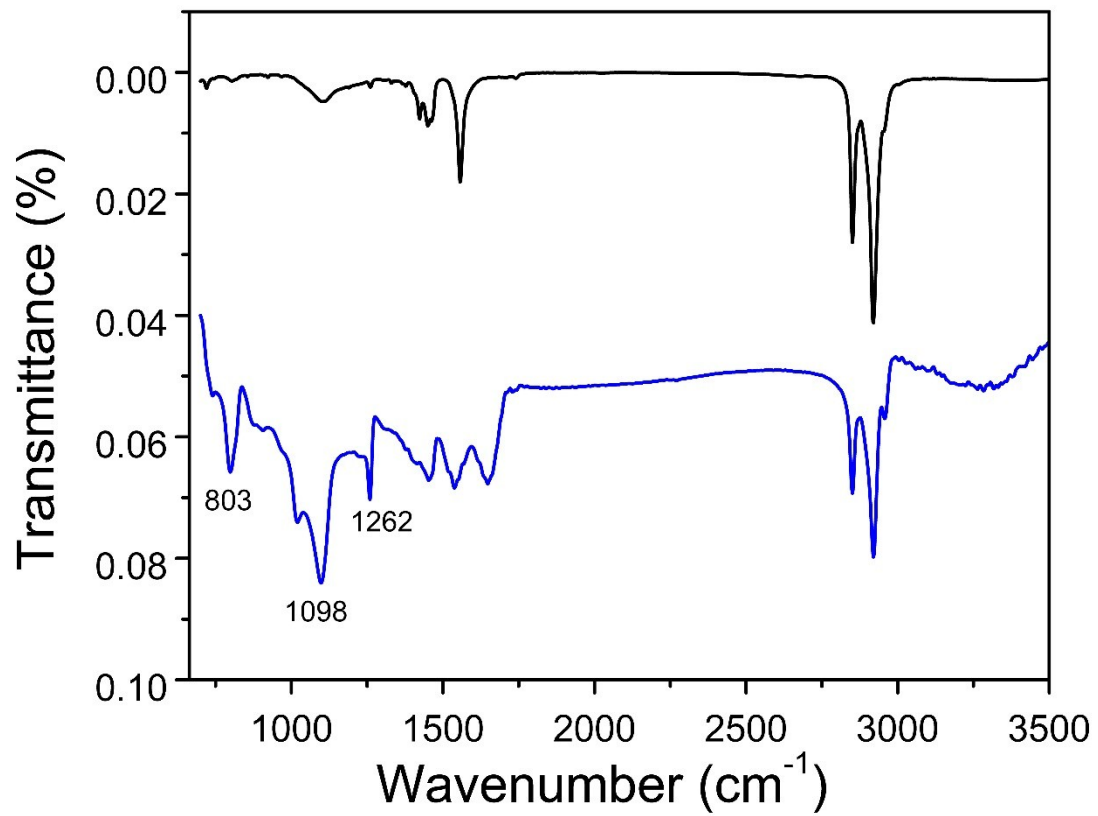

**Fig. S5** FTIR spectra of oleate capped  $\text{NaGdF}_4: \text{Yb}^{3+}, \text{Er}^{3+}@ \text{NaGdF}_4$  UCNPs (black line) and  $\text{NaGdF}_4: \text{Yb}^{3+}, \text{Er}^{3+}@ \text{NaGdF}_4$  UCNP@RB-pCasCPP (blue line).

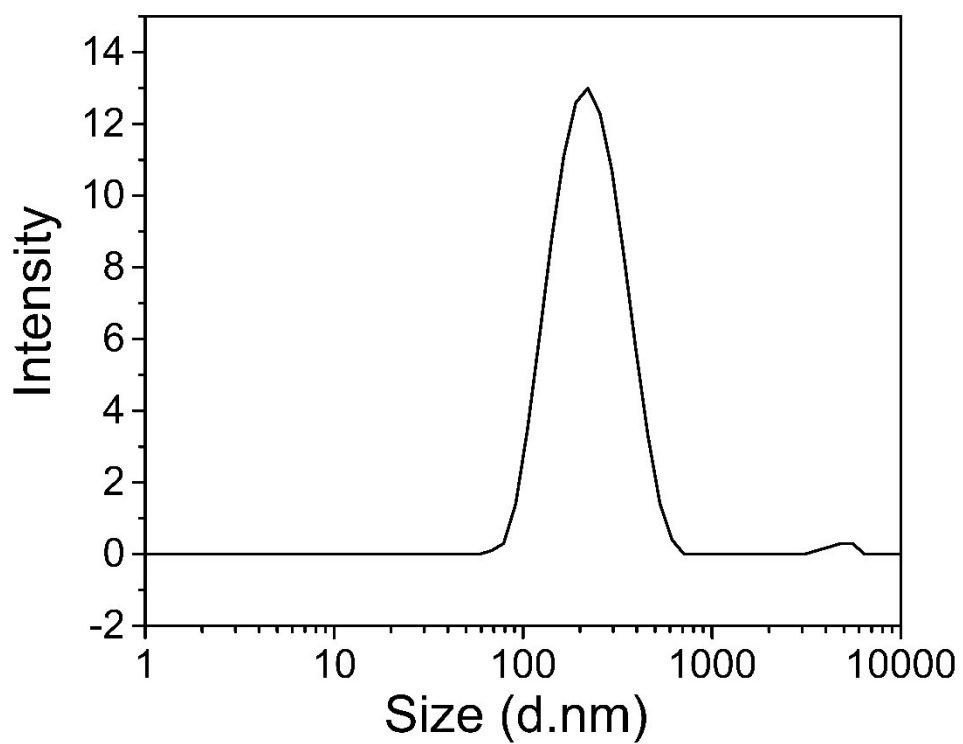

**Fig. S6** DLS size distribution of NaGdF<sub>4</sub>: Yb<sup>3+</sup>, Er<sup>3+</sup>@NaGdF<sub>4</sub> UCNP@RB-pCasCPP.

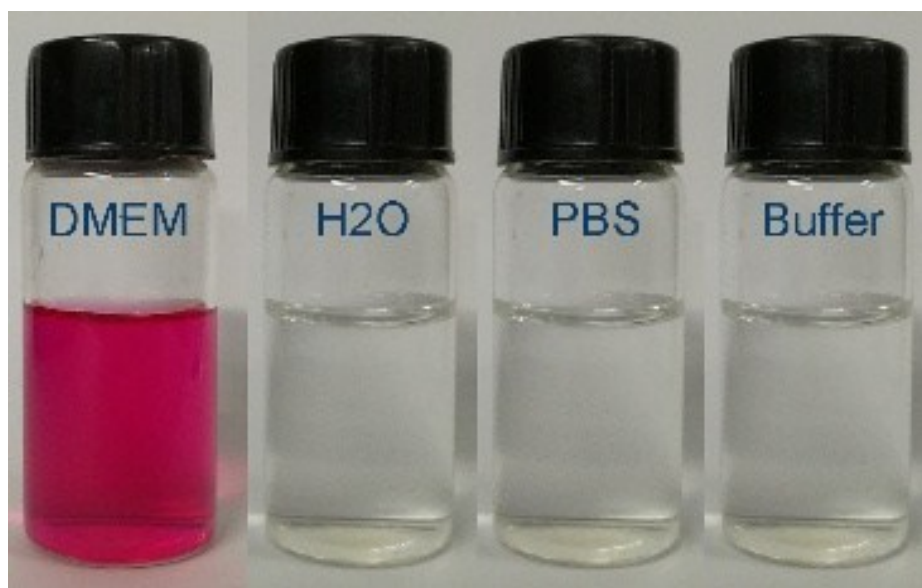

**Fig. S7** Digital images of NaGdF<sub>4</sub>: Yb<sup>3+</sup>, Er<sup>3+</sup>@NaGdF<sub>4</sub> UCNP@RB-pCasCPP re-dispersed in different media after 12 h.



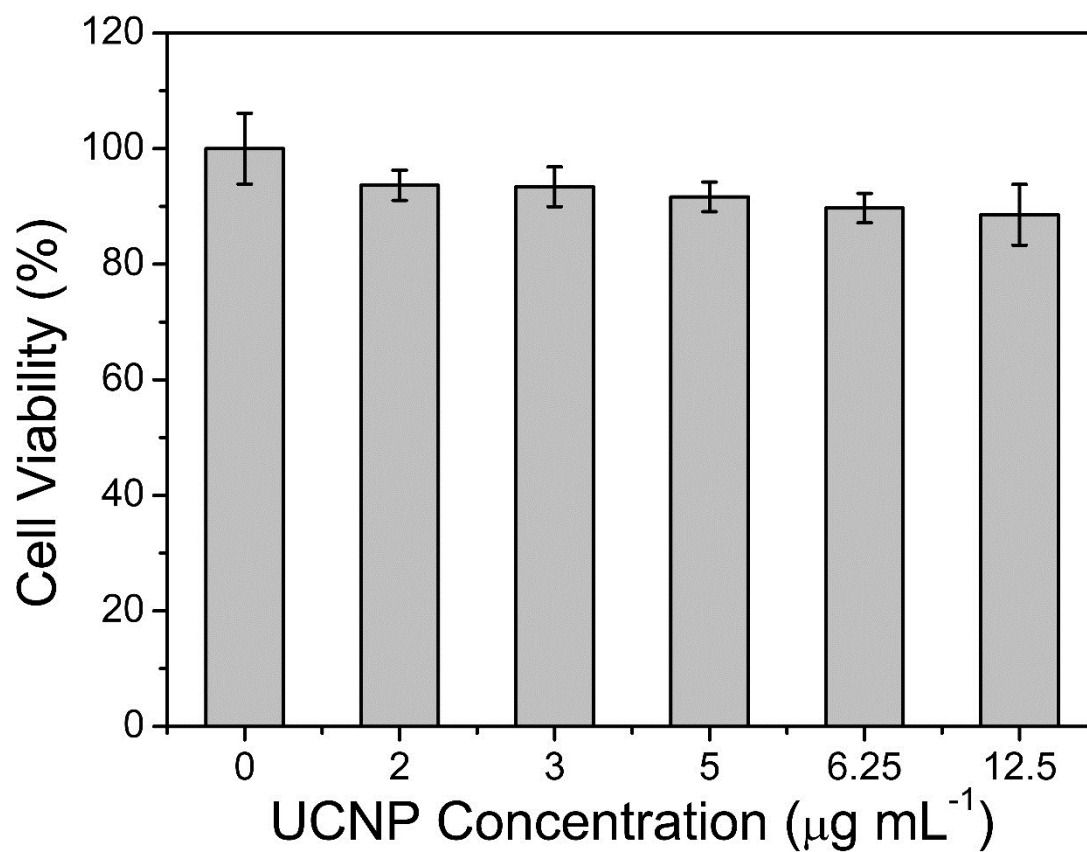

**Fig. S8** Cell viability as a function of the concentration of  $\text{NaGdF}_4: \text{Yb}^{3+}, \text{Er}^{3+}@\text{NaGdF}_4 \text{UCNP}@ \text{RB-pCasCPP}$ .
